# Supplementary material
Source: PubMed Central journal article supplement (PMC6832066)
Supplement: JB.00393-19-s0001.pdf [file JB.00393-19-s0001.pdf]

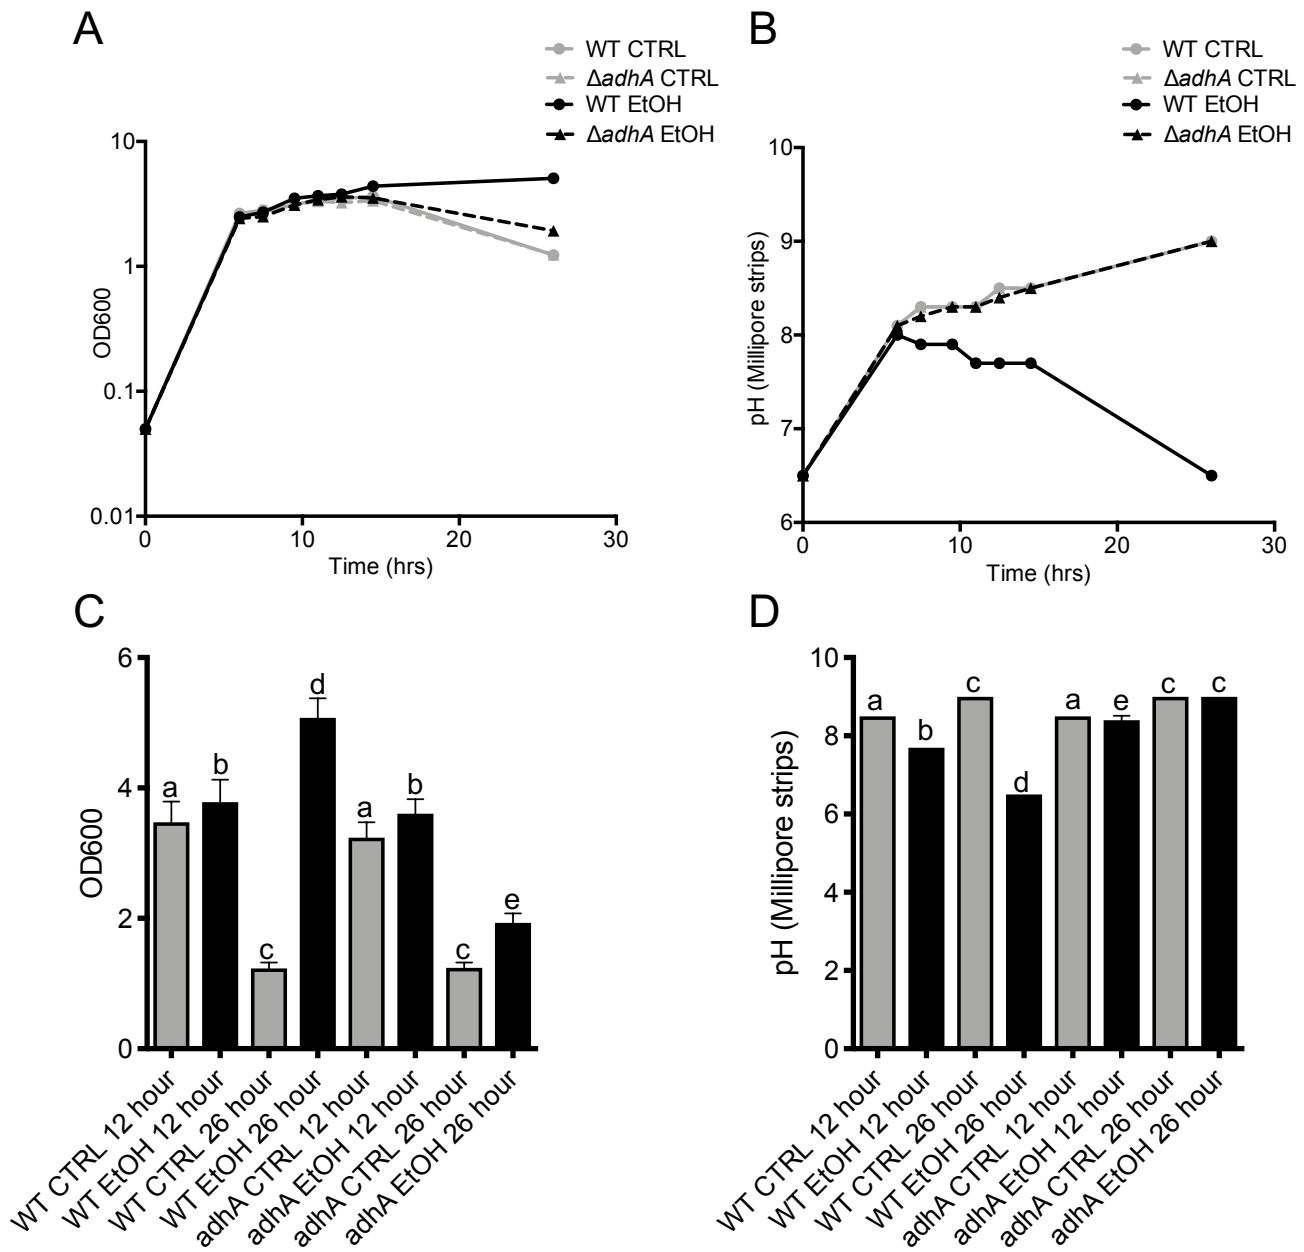

**Figure S1.** Culture pH in LB with 1% ethanol begins to deviate from LB alone near the transition from exponential to stationary phase around an OD<sub>600</sub> of 3.0. Cultures were grown in LB alone or LB amended with 1% ethanol at 37°C, with an initial inoculation of 0.05 OD<sub>600</sub>. Optical density (A) and pH measurements (B) were taken beginning at 6 hours post-inoculation. Each point is the mean of 4 independent cultures and data are representative of at least 2 independent experiments. Panels C and D represent the mean and standard deviation of the 4 individual cultures in A and B at 12 hours and 26 hours post-inoculation. Letters above each bar represent statistical groupings for OD<sub>600</sub> (C) and pH (D).

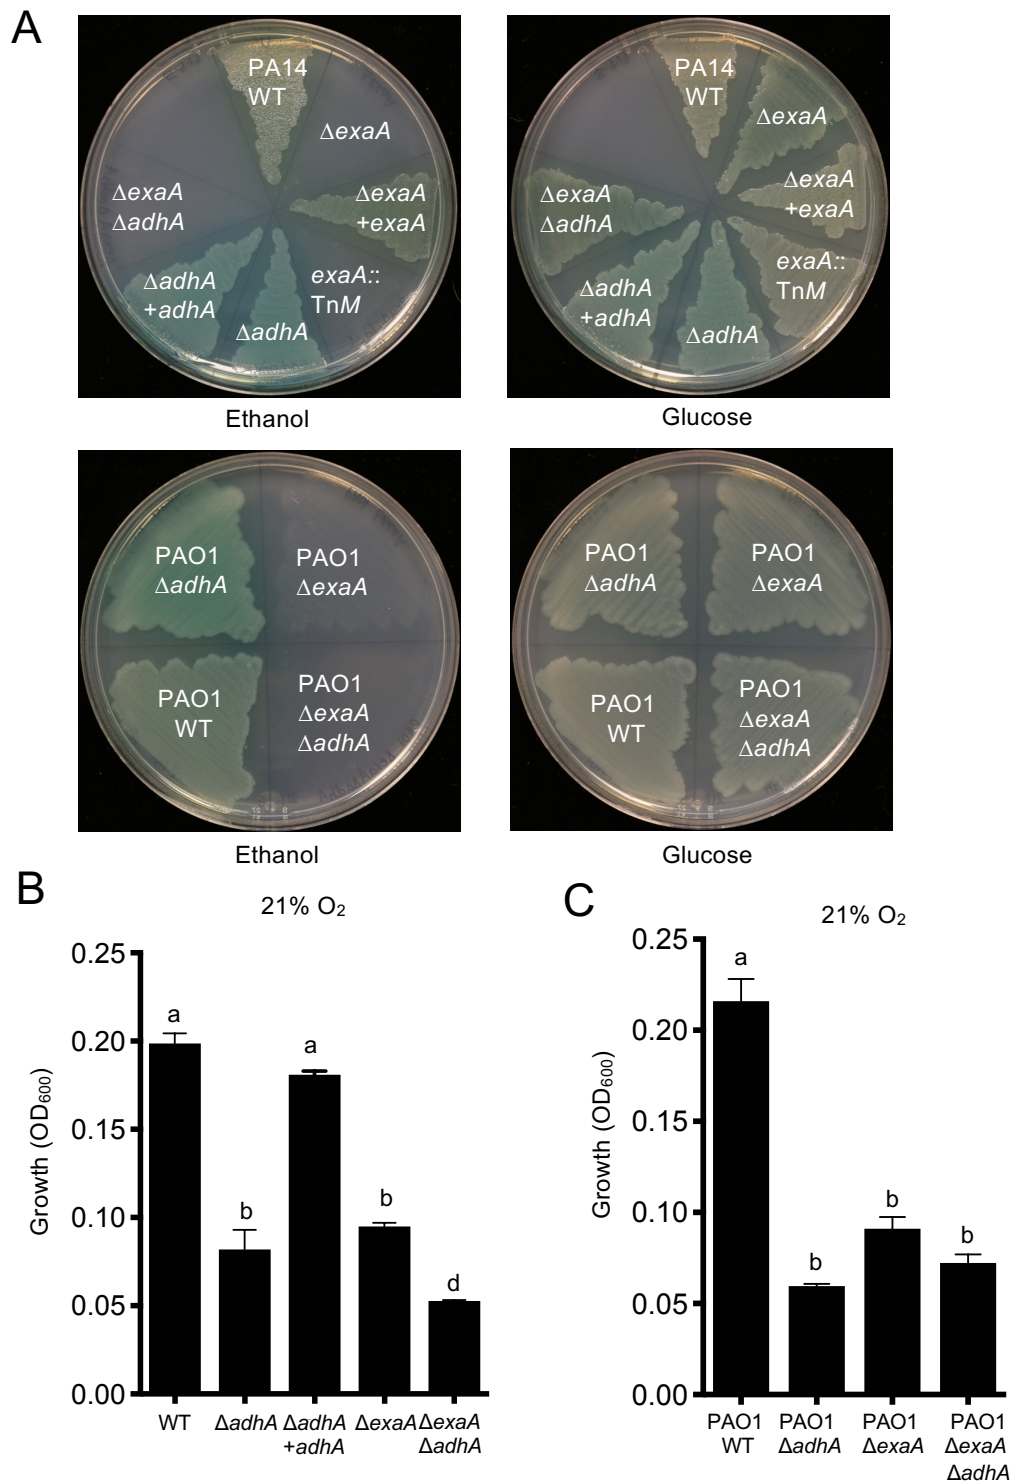

**Figure S2.** Growth of *P. aeruginosa* strains on ethanol as a sole carbon source. **A.** *P. aeruginosa* PA14 (top) and PAO1 (bottom) wild types and their *exaA* or *adhA* derivative and mutants after complementation. In each strain background, an  $\Delta exaA \Delta adhA$  strain is also shown. All strains were grown on 1.5% agar M63 with either ethanol or glucose, as indicated, as the sole carbon source at 37 C for 24 h. Data are representative of at least three independent experiments. **B and C.** Growth of PA14 and PAO1 strains listed in M63 liquid with ethanol as the sole carbon source in 21% oxygen. Statistics based on one-way ANOVA and Tukey's multiple comparison; between group comparisons were significant with a  $P < 0.001$  in panel B and  $P < 0.0001$  in panel C.

**Table S1. Strains used in this study.**

| Strain                                         | Lab Strain | Strain description                                                          | Source     |
|------------------------------------------------|------------|-----------------------------------------------------------------------------|------------|
| <b><i>P. aeruginosa</i></b>                    |            |                                                                             |            |
| PA14 WT                                        | DH123      | Laboratory reference strain                                                 | (1)        |
| PA14 <i>exaA</i> ::TnM                         | DH2130     | Transposon insertion mutant in <i>exaA</i>                                  | (2)        |
| PA14 $\Delta$ <i>exaA</i>                      | DH3470     | In-frame deletion of <i>exaA</i>                                            | This study |
| PA14 $\Delta$ <i>exaA</i> + <i>exaA</i>        | DH2677     | Complementation of <i>exaA</i> at the native locus                          | This study |
| PA14 $\Delta$ <i>adhA</i>                      | DH2255     | In-frame deletion of <i>adhA</i>                                            | This study |
| PA14 $\Delta$ <i>adhA</i> $\Delta$ <i>exaA</i> | DH2257     | In-frame deletion of <i>adhA</i> and <i>exaA</i>                            | This study |
| PA14 $\Delta$ <i>adhA</i> + <i>adhA</i>        | DH3463     | Complementation of <i>adhA</i> at the native locus                          | This study |
| PA14 <i>pqqB</i> ::TnM                         | DH2131     | Transposon insertion mutant in <i>pqqB</i>                                  | (2)        |
| PA14 <i>acsA</i> ::TnM                         | DH2168     | Transposon insertion mutant in <i>acsA</i>                                  | (2)        |
| PA14 $\Delta$ <i>anr</i>                       | DH2855     | In-frame deletion of <i>anr</i>                                             | This study |
| PA14 $\Delta$ <i>anr</i> + <i>anr</i>          | DH3478     | PA14 $\Delta$ <i>anr</i> complemented with <i>anr</i> at the native locus   | This study |
| PA14 $\Delta$ <i>lasR</i>                      | DH164      | in-frame deletion of <i>lasR</i>                                            | (3)        |
| PA14 $\Delta$ <i>lasR</i> + <i>lasR</i>        | DH3398     | PA14 $\Delta$ <i>lasR</i> complemented with <i>lasR</i> at the native locus | (4)        |
| PA14 $\Delta$ <i>lasR</i> $\Delta$ <i>anr</i>  | DH2401     | <i>anr</i> deleted in DH164                                                 | (5)        |
| PA14 $\Delta$ <i>lasR</i> $\Delta$ <i>adhA</i> | DH3464     | In-frame deletion of <i>lasR</i> and <i>adhA</i> in DH164                   | This study |
| $\Delta$ <i>adhA</i> + EV                      | DH3475     | DH2255 carrying DH1682                                                      | This study |
| $\Delta$ <i>adhA</i> + <i>adhA</i> OE          | DH3476     | DH2255 carrying DH3483 <i>adhA</i> expression vector                        | This study |
| $\Delta$ <i>anr</i> + EV                       | DH3477     | DH2855 carrying DH1682                                                      | This study |
| $\Delta$ <i>anr</i> + <i>adhA</i> OE           | DH3474     | DH2855 carrying DH3483 <i>adhA</i> expression vector                        | This study |
| $\Delta$ <i>anr</i> + <i>anrD149A</i>          | DH3480     | PA14 with wild-type <i>anr</i> replaced with <i>anrD149A</i> allele         | This study |
| PAO1 WT                                        | DH1856     | Laboratory reference strain                                                 | (6)        |
| PAO1 $\Delta$ <i>adhA</i>                      | DH2252     | In-frame deletion of <i>adhA</i> in DH1856                                  | This study |

|                         |        |                                                    |            |
|-------------------------|--------|----------------------------------------------------|------------|
| <b><i>E. coli</i></b>   |        |                                                    |            |
| S17 $\lambda$ pir       | DH71   |                                                    |            |
|                         |        |                                                    |            |
| <b>Plasmids</b>         |        |                                                    |            |
| pMQ30                   | DH962  | allelic replacement vector, GmR                    | (7)        |
| pMQ70 EV                | DH1682 | pMQ70 expression vector                            | (7)        |
| <i>padhA</i> OE         | DH3483 | <i>padhA</i> expression vector in pMQ70            | This study |
| <i>padhA</i> KO         | DH2159 | <i>adhA</i> in-frame deletion construct in pMQ30   | This study |
| <i>padhA</i> complement | DH2162 | <i>adhA</i> complementation construct in pMQ30     | This study |
| <i>anrD149A</i> allele  | DH3482 | <i>anrD149A</i> allele replacement vector in pMQ30 | This study |
| <i>anr</i> complement   | DH3481 | <i>Anr</i> complementation construct in pMQ30      | This study |

## References

1. Rahme LG, Stevens EJ, Wolfort SF, Shao J, Tompkins RG, Ausubel FM. 1995. Common virulence factors for bacterial pathogenicity in plants and animals. *Science* 268:1899-902.
2. Feinbaum RL, Urbach JM, Liberati NT, Djonovic S, Adonizio A, Carvunis AR, Ausubel FM. 2012. Genome-wide identification of *Pseudomonas aeruginosa* virulence-related genes using a *Caenorhabditis elegans* infection model. *PLoS Pathog* 8:e1002813.
3. Hogan DA, Vik A, Kolter R. 2004. A *Pseudomonas aeruginosa* quorum-sensing molecule influences *Candida albicans* morphology. *Mol Microbiol* 54:1212-23.
4. Harty CE, Martins D, Doing G, Mould DL, Clay ME, Occhipinti P, Nguyen D, Hogan DA. 2019. Ethanol stimulates trehalose production through a SpoT-DksA-AlgU-dependent pathway in *Pseudomonas aeruginosa*. *J Bacteriol* 201.
5. Hammond JH, Dolben EF, Smith TJ, Bhujju S, Hogan DA. 2015. Links between Anr and quorum sensing in *Pseudomonas aeruginosa* biofilms. *J Bacteriol* 197:2810-20.
6. Vallet-Gely I, Sharp JS, Dove SL. 2007. Local and global regulators linking anaerobiosis to *cupA* fimbrial gene expression in *Pseudomonas aeruginosa*. *J Bacteriol* 189:8667-76.
7. Shanks RM, Caiazza NC, Hinsa SM, Toutain CM, O'Toole GA. 2006. *Saccharomyces cerevisiae*-based molecular tool kit for manipulation of genes from gram-negative bacteria. *Appl Environ Microbiol* 72:5027-36.

**Table S2. Primers used in this study.**

| <b>Tn mutant confirmation primers</b>     |                    |                                                                     |
|-------------------------------------------|--------------------|---------------------------------------------------------------------|
| <b>Gene</b>                               | <b>Primer</b>      | <b>Sequence</b>                                                     |
| <i>exaA</i>                               | exaA Tn conf_FWD   | ACAACGTGTTCAAGCTGAC                                                 |
|                                           | exaA Tn conf_REV   | ACACCTTGTCGCCATAGA                                                  |
|                                           |                    |                                                                     |
| <b>Strain construction and sequencing</b> |                    |                                                                     |
| <b>Gene/<br/>Feature</b>                  | <b>Primer</b>      | <b>Sequence</b>                                                     |
| <i>adhA</i>                               | DH_SDW1            | ATCTGCACGATGGAGAGCAGCGA                                             |
|                                           | DH_SDW2            | TTGCAGATGGACCCGGAGAT                                                |
|                                           | DH_SDW3            | AGCGGCCAGACTGGTTGT                                                  |
|                                           | DH_SDW4            | TACAAGGGGCTCAAGCAGAC                                                |
|                                           | Out_1              | TGAACATCGACTTCTCGAACCAGC                                            |
|                                           | Out_2              | ATGACGGGATTTGTCTCAGAGGGA                                            |
|                                           | Rec_FW             | ACACTAGTCATGGTTTCGAGCCTTACC                                         |
|                                           | Rec_RV             | TTAAGCTTAAGTGGCTGGAGGATTC                                           |
|                                           |                    |                                                                     |
| <i>exaA</i>                               |                    |                                                                     |
|                                           | DH_SDW5            | GCTTCTGCGTTCTGATTTAATCTGTATC<br>AGGCTGATAGATCATGGCGAAGCTCTC<br>CTGT |
|                                           | DH_SDW6            | GGCAGCTTGAATACCCAGAAGGAACGT<br>TTGGAGTGAGGGTTCGAGAAA                |
|                                           | DH_SDW7            | TTTCTCGACCCTCACTCCAAACGTTCT<br>TCTGGGTATTCAAGCTGCC                  |
|                                           | DH_SDW8            | GAGCGGATAACAATTTACACAGGAAA<br>CAGCTATGTGCTCAAGCAGAAGTTGCA<br>GGTGA  |
|                                           | exaA_sequencing_1  | CGCGCGCAGTTCTGGTTGTA                                                |
|                                           | exaA_sequencing_2  | TTTCCAGTTGGCCAGGTCGAG                                               |
|                                           | exaA_KO_Chk_UP_FW  | GAACGGGGGAAGTTCGGCGATC                                              |
|                                           | exaA_KO_Chk_Dwn_RV | CGTGGGAAGAGCAGGGCGG                                                 |
|                                           |                    |                                                                     |

|            |                  |                                                                       |
|------------|------------------|-----------------------------------------------------------------------|
| <i>anr</i> | ^Anr_pmQ30_1     | TGCGTTCTGATTTAATCTGTATCAGGCT<br>GATGTTTCATGAACTGGGTCATGAAGGG<br>TTGGC |
|            | ^Anr_pmQ30_2     | GTGCCTTTAACCTAGCAAGGACCCCTC<br>AAGCGCCTGCGAACCGCCAAC                  |
|            | ^Anr_pmQ30_3     | GTTGGCGGTTTCGCAGGCGCTTGAGGG<br>GTCCTTGCTAGGTAAAGGCAC                  |
|            | ^Anr_pmQ30_4     | TGAGCGGATAACAATTTCACACAGGAA<br>ACAGCTATGTCTGCCACTTCGAACTGG<br>CCTTCG  |
|            | Anr_Chk_FW1      | CGCGCGGTGATCCAGCAACTG                                                 |
|            | Anr_Chk_RV1      | GTAGGGGAAGAGCGAGGACAGG                                                |
|            |                  |                                                                       |
| pMQ30      | pMQ30_seq_mcs_FW | CCTCTTCGCTATTACGCCAGCTGG                                              |
|            | pMQ30_seq_mcs_RV | GCTCACTCATTAGGCACCCCAGG                                               |
